# Supplementary material for: A multi-layered and dynamic apical extracellular matrix shapes the vulva lumen in Caenorhabditis elegans
Source: eLife. 2020 Sep 25;9:e57874. doi: 10.7554/eLife.57874 (PMC7544507; doi:10.7554/eLife.57874)
Supplement: Figure 8—source data 1. — C. elegans were monitored during their first week of adulthood for failure to lay eggs or rupture through their vulva. Both defects were rare in WT but were more common in let-653, mig-22, and mig-22;let-653 mutants. See Figures 8 and 11. [file elife-57874-fig8-data1.xlsx]

## Sheet: Sheet1
Strain	% Egl	% Rup	n =
N2	0	3	133
let-653	7.8	12.8	141
let-653 (line 2)	9.9	4.4	91
let-653; csEx[LET-653]	0	2.8	109
let-653; csEx[ZP]	2.2	5.8	137
mig-22	1.4	50.7	140
mig-22; let-653 (line 1)	88	4.3	92
mig-22; let-653 (line 2)	91.1	5.6	56
Strain	Strain Name	No. Egl	No. Rup	No. Live	Total
N2	N2	0	4	129	133
let-653	UP3342	11	18	112	141
let-653 (line 2)	UP3461	9	4	78	91
let-653; csEx[LET-653]	UP3244	0	3	106	109
let-653; csEx[ZP]	UP3462	3	8	126	137
mig-22	NF68	2	71	67	140
mig-22; let-653 (line 1)	UP3967	81	4	7	92
mig-22; let-653 (line 2)	UP3968	51	3	2	56
