# Supplementary material for: A multi-layered and dynamic apical extracellular matrix shapes the vulva lumen in Caenorhabditis elegans
Source: eLife. 2020 Sep 25;9:e57874. doi: 10.7554/eLife.57874 (PMC7544507; doi:10.7554/eLife.57874)
Supplement: Figure 8—source data 2. — Measurements are taken from boxes drawn within DIC images of vulvas at L4.7 stage. See Figure 8 and Figure 8—figure supplement 1. [file elife-57874-fig8-data2.xlsx]

## Sheet: Data for figure 8.C, S3_L4.7_vu
length and width of rectangles drawn within the vulva
Generated 10/27/2019
All measurements are in microns
Original name	New name	Strain Name	Genotype	Shoulder Height	Shoulder Width	Neck Height	Neck Width
(mig-22);let-653.14.vulva.dic.tif	5418647.tiff	UP3967	mig-22; let-653	7.5962	6.5385	7.5	2.1154
(mig-22);let-653.26.vulva.dic.tif	1063564.tiff	UP3967	mig-22; let-653	7.5962	7.7885	9.4231	1.5385
(mig-22);let-653.29.vulva.dic.tif	3455672.tiff	UP3967	mig-22; let-653	6.1538	10.0962	7.4038	1.1538
(mig-22);let-653.57.vulva.dic.tif	8897658.tiff	UP3967	mig-22; let-653	10.3846	12.2115	12.9808	2.1154
(mig-22);let-653.72.vulva.dic.tif	6896154.tiff	UP3967	mig-22; let-653	7.5	10.2885	10.0962	4.5192
(mig-22);let-653.73.vulva.dic.tif	4134668.tiff	UP3967	mig-22; let-653	6.25	9.2308	8.3654	0.5769
(mig-22);let-653.74.vulva.dic.tif	6968458.tiff	UP3967	mig-22; let-653	8.4615	9.5192	10.7692	3.4615
(mig-22);let-653.75.vulva.dic.tif	2727172.tiff	UP3967	mig-22; let-653	7.6923	6.0577	7.7885	0.4808
(mig-22);let-653.76.vulva.dic.tif	80852.tiff	UP3967	mig-22; let-653	5.9615	6.5385	10.2885	0.5769
(mig-22);let-653.77.vulva.dic.tif	9060381.tiff	UP3967	mig-22; let-653	7.5	6.4423	8.1731	0.5769
(mig-22);let-653.78.vulva.dic.tif	3643112.tiff	UP3967	mig-22; let-653	8.0769	7.7885	8.8462	2.2115
(mig-22);let-653.79.vulva.dic.tif	9604793.tiff	UP3967	mig-22; let-653	6.7308	11.4423	7.2115	0.9615
(mig-22);let-653.80.vulva.dic.tif	397598.tiff	UP3967	mig-22; let-653	5.8654	8.3654	7.5	0.7692
(mig-22);let-653.81.vulva.dic.tif	3410333.tiff	UP3967	mig-22; let-653	7.9808	10.7692	9.4231	3.6538
(mig-22);let-653.82.vulva.dic.tif	2509572.tiff	UP3967	mig-22; let-653	8.3654	5.4808	7.5962	0.4808
(mig-22);let-653.83.vulva.dic.tif	198556.tiff	UP3967	mig-22; let-653	5.8654	9.7115	8.5577	0.7692
(mig-22);let-653.84.vulva.dic.tif	4852330.tiff	UP3967	mig-22; let-653	5.5769	8.6538	6.25	0.6731
(mig-22);let-653.86.vulva.dic.tif	3716853.tiff	UP3967	mig-22; let-653	8.5577	7.9808	10.0962	4.9038
(mig-22);let-653.9.vulva.dic.tif	616773.tiff	UP3967	mig-22; let-653	8.4615	8.5577	9.2308	2.9808
N2.10-4-19.1.dic.tif	7933596.tiff	N2	WT	8.6538	12.5962	6.25	2.5
N2.10-4-19.2.dic.tif	3164592.tiff	N2	WT	9.3269	10.9615	7.0192	0.7692
N2.10-4-19.3.dic.tif	9449351.tiff	N2	WT	8.3654	11.25	5.4808	3.0769
N2.18.vulva.dic.tif	1027778.tiff	N2	WT	10	10.0962	8.5577	3.3654
N2.56.vulva.dic.tif	8825142.tiff	N2	WT	8.0769	12.4038	4.6154	4.0385
N2.58.vulva.dic.tif	6057157.tiff	N2	WT	8.8462	11.0577	6.8269	4.8077
N2.66.vulva.dic.tif	6720753.tiff	N2	WT	10.2885	12.6923	9.0385	8.0769
N2.68.vulva.dic.tif	715306.tiff	N2	WT	7.7885	12.9808	5.0962	4.3269
N2.78.vulva.dic.tif	5072614.tiff	N2	WT	10.6731	13.6538	7.1154	8.8462
N2.87.vulva.dic.tif	3306677.tiff	N2	WT	8.4615	9.5192	5.1923	2.8846
N2.9.vulva.dic.tif	2986717.tiff	N2	WT	9.0385	12.2115	5.5769	2.1154
N2.92.vulva.dic.tif	4205418.tiff	N2	WT	7.8846	11.6346	5.6731	2.5
N2.94.vulva.dic.tif	8774263.tiff	N2	WT	9.8077	12.2115	11.3462	9.6154
N2.L4vul.1.tiff	2519525.tiff	N2	WT	9.3269	12.7885	5.9615	7.2115
N2.L4vul.18.tiff	5352705.tiff	N2	WT	8.8462	11.8269	6.25	3.3654
N2.L4vul.20.tiff	5266921.tiff	N2	WT	9.3269	13.4615	6.0577	2.2115
N2.L4vul.22.tiff	267638.tiff	N2	WT	10.4808	11.1538	11.0577	5.2885
N2.L4vul.23.tiff	2856016.tiff	N2	WT	8.75	12.3077	6.5385	2.0192
N2.L4vul.3.tiff	2545649.tiff	N2	WT	9.6154	10.7692	6.6346	2.7885
N2.L4vul.31.tiff	1096169.tiff	N2	WT	10	9.7115	10.0962	1.25
N2.L4vul.36.tiff	9446701.tiff	N2	WT	10.6731	13.4615	7.5962	4.5192
N2.L4vul.7.tiff	1827392.tiff	N2	WT	9.2308	13.6538	5.9615	6.0577
NF68.10.vulva.dic.tif	2466831.tiff	NF68	mig-22	6.1538	8.1731	8.9423	0.3846
NF68.24.vulva.dic.tif	4444172.tiff	NF68	mig-22	5.1923	9.3269	8.6538	0.7692
NF68.27.vulva.dic.tif	771948.tiff	NF68	mig-22	6.5385	9.7115	7.1154	1.4423
NF68.30.vulva.dic.tif	4068390.tiff	NF68	mig-22	6.9231	9.5192	7.3077	2.0192
NF68.31.vulva.dic.tif	7911514.tiff	NF68	mig-22	5.7692	8.2692	9.5192	0.8654
NF68.44.vulva.dic.tif	4415011.tiff	NF68	mig-22	6.0577	5.4808	7.4038	0.5769
NF68.45.vulva.dic.tif	7302786.tiff	NF68	mig-22	5.4808	9.2308	7.0192	1.7308
NF68.46.vulva.dic.tif	3988862.tiff	NF68	mig-22	6.1538	7.5	8.6538	0.8654
NF68.5.vulva.dic.tif	7642307.tiff	NF68	mig-22	8.0769	10.4808	10.0962	0.6731
NF68.52.vulva.dic.tif	9217440.tiff	NF68	mig-22	7.5962	6.7308	9.6154	0.5769
NF68.53.vulva.dic.tif	6304012.tiff	NF68	mig-22	6.8269	9.3269	6.6346	1.5385
NF68.60.vulva.dic.tif	8991311.tiff	NF68	mig-22	4.7115	8.5577	7.4038	0.6731
NF68.66.vulva.dic.tif	2522371.tiff	NF68	mig-22	7.6923	6.7308	8.9423	0.8654
NF68.67.vulva.dic.tif	6326530.tiff	NF68	mig-22	7.5	4.2308	8.5577	0.4808
NF68.68.vulva.dic.tif	5898161.tiff	NF68	mig-22	4.8077	8.1731	9.2308	1.4423
NF68.69.vulva.dic.tif	6924195.tiff	NF68	mig-22	5	7.8846	9.2308	0.5769
NF68.7.vulva.dic.tif	721460.tiff	NF68	mig-22	6.6346	5.1923	6.4423	0.9615
NF68.70.vulva.dic.tif	981926.tiff	NF68	mig-22	6.3462	8.1731	8.4615	0.6731
NF68.8.vulva.dic.tif	3726079.tiff	NF68	mig-22	3.0769	7.4038	13.4615	1.5385
NF68.9.vulva.dic.tif	6587191.tiff	NF68	mig-22	6.6346	9.4231	8.9423	0.5769
UP2386.10.dic.tif	3034456.tiff	UP2386	Ex[LET-653]	9.5192	11.8269	7.2115	2.4038
UP2386.12.dic.tif	5869674.tiff	UP2386	Ex[LET-653]	9.6154	12.5	6.3462	3.3654
UP2386.13.dic.tif	2508391.tiff	UP2386	Ex[LET-653]	9.0385	10.9615	6.8269	1.8269
UP2386.18.dic.tif	252421.tiff	UP2386	Ex[LET-653]	9.3269	10	7.6923	1.3462
UP2386.24.dic.tif	4426896.tiff	UP2386	Ex[LET-653]	9.5192	11.4423	6.3462	2.4038
UP2386.25.dic.tif	9341318.tiff	UP2386	Ex[LET-653]	8.3654	12.0192	5.4808	3.3654
UP2386.30.dic.tif	3726501.tiff	UP2386	Ex[LET-653]	9.1346	9.8077	8.6538	1.8269
UP2386.31.dic.tif	2256334.tiff	UP2386	Ex[LET-653]	10	11.3462	8.0769	0.7692
UP2386.32.dic.tif	4995694.tiff	UP2386	Ex[LET-653]	8.9423	10.0962	9.7115	0.9615
UP2386.33.dic.tif	9669087.tiff	UP2386	Ex[LET-653]	8.5577	12.0192	9.7115	2.5962
UP2386.34.dic.tif	5313261.tiff	UP2386	Ex[LET-653]	9.1346	11.5385	6.0577	3.0769
UP2386.35.dic.tif	7079789.tiff	UP2386	Ex[LET-653]	9.1346	11.9231	7.0192	1.9231
UP2386.36.dic.tif	7758569.tiff	UP2386	Ex[LET-653]	9.6154	11.1538	7.5962	2.6923
UP2386.37.dic.tif	141930.tiff	UP2386	Ex[LET-653]	9.3269	12.9808	7.5962	2.4038
UP2386.39.dic.tif	2278731.tiff	UP2386	Ex[LET-653]	10.2885	12.1154	6.8269	2.2115
UP2386.4.dic.tif	7005411.tiff	UP2386	Ex[LET-653]	8.6538	12.1154	6.4423	2.2115
UP2386.40.dic.tif	6571925.tiff	UP2386	Ex[LET-653]	8.1731	12.1154	5.7692	2.7885
UP2386.41.dic.tif	6576665.tiff	UP2386	Ex[LET-653]	9.7115	12.0192	6.4423	2.8846
UP2386.42.dic.tif	5119390.tiff	UP2386	Ex[LET-653]	10.4808	10.6731	7.7885	0.8654
UP2386.43.dic.tif	2361659.tiff	UP2386	Ex[LET-653]	9.4231	9.8077	8.1731	0.7692
UP2386.44.dic.tif	3815617.tiff	UP2386	Ex[LET-653]	9.8077	10.5769	6.4423	1.0577
UP3244.16.vulva.dic.tif	2411273.tiff	UP3244	let-653; Ex[LET-653]	12.1154	14.6154	9.5192	10.8654
UP3244.22.vulva.dic.tif	1632735.tiff	UP3244	let-653; Ex[LET-653]	11.0577	16.5385	5.5769	9.5192
UP3244.47.vulva.dic.tif	6694696.tiff	UP3244	let-653; Ex[LET-653]	9.6154	12.3077	7.7885	4.6154
UP3244.51.vulva.dic.tif	9141843.tiff	UP3244	let-653; Ex[LET-653]	9.9038	13.4615	8.5577	4.4231
UP3244.52.vulva.dic.tif	9968331.tiff	UP3244	let-653; Ex[LET-653]	8.4615	14.2308	6.1538	4.0385
UP3244.53.vulva.dic.tif	1481550.tiff	UP3244	let-653; Ex[LET-653]	9.9038	12.3077	6.4423	4.6154
UP3244.54.vulva.dic.tif	7737693.tiff	UP3244	let-653; Ex[LET-653]	10.0962	12.8846	6.3462	4.4231
UP3244.56.vulva.dic.tif	801058.tiff	UP3244	let-653; Ex[LET-653]	9.6154	11.9231	7.5	4.3269
UP3244.63.vulva.dic.tif	1419252.tiff	UP3244	let-653; Ex[LET-653]	9.2308	13.5577	6.0577	4.9038
UP3244.67.vulva.dic.tif	1507759.tiff	UP3244	let-653; Ex[LET-653]	11.1538	14.7115	7.6923	10.1923
UP3244.69.vulva.dic.tif	3342135.tiff	UP3244	let-653; Ex[LET-653]	11.25	15.0962	7.5962	7.8846
UP3244.70.vulva.dic.tif	9214137.tiff	UP3244	let-653; Ex[LET-653]	9.9038	14.3269	6.5385	8.5577
UP3244.71.vulva.dic.tif	1456412.tiff	UP3244	let-653; Ex[LET-653]	8.9423	13.2692	6.3462	3.6538
UP3244.72.vulva.dic.tif	5502223.tiff	UP3244	let-653; Ex[LET-653]	11.25	13.2692	8.9423	5.5769
UP3244.74.vulva.dic.tif	2835910.tiff	UP3244	let-653; Ex[LET-653]	10.8654	13.0769	8.75	2.7885
UP3244.75.vulva.dic.tif	2949908.tiff	UP3244	let-653; Ex[LET-653]	11.7308	11.8269	7.6923	3.75
UP3244.76.vulva.dic.tif	5964064.tiff	UP3244	let-653; Ex[LET-653]	10.5769	13.6538	7.3077	4.5192
UP3244.77.vulva.dic.tif	5891903.tiff	UP3244	let-653; Ex[LET-653]	10.4808	13.3654	6.7308	5.1923
UP3244.78.vulva.dic.tif	1331729.tiff	UP3244	let-653; Ex[LET-653]	11.25	14.0385	7.8846	6.1538
UP3244.9.vulva.dic.tif	1620202.tiff	UP3244	let-653; Ex[LET-653]	10.9615	15.6731	7.2115	9.6154
UP3342-let-653;csEx766.25.L4vulv.tiff	5257719.tiff	UP3342	let-653; Ex[ductpro::LET-653]	9.2308	13.1731	6.4423	4.6154
UP3342-let-653;csEx766.39.L4vulv.tiff	9060877.tiff	UP3342	let-653; Ex[ductpro::LET-653]	6.7308	13.9423	4.6154	2.9808
UP3342-let-653;csEx766.5.L4vulv.tiff	927672.tiff	UP3342	let-653; Ex[ductpro::LET-653]	10.6731	10.4808	7.7885	3.3654
UP3342-let-653;csEx766.7.L4vulv.tiff	9608510.tiff	UP3342	let-653; Ex[ductpro::LET-653]	11.6346	14.9038	8.3654	8.5577
UP3342.10.vulva.4-4-19.dic.tif	5543961.tiff	UP3342	let-653; Ex[ductpro::LET-653]	7.9808	12.5	6.7308	3.6538
UP3342.12.vulva.4-4-19.dic.tif	2608559.tiff	UP3342	let-653; Ex[ductpro::LET-653]	9.1346	12.2115	6.1538	3.0769
UP3342.12.vulva.dic.tif	2353205.tiff	UP3342	let-653; Ex[ductpro::LET-653]	10	14.7115	7.5962	9.9038
UP3342.18.vulva.4-4-19.dic.tif	3949207.tiff	UP3342	let-653; Ex[ductpro::LET-653]	7.6923	12.9808	4.9038	3.3654
UP3342.19.vulva.dic.tif	1310942.tiff	UP3342	let-653; Ex[ductpro::LET-653]	8.5577	11.5385	6.0577	4.7115
UP3342.21.vulva.dic.tif	4964889.tiff	UP3342	let-653; Ex[ductpro::LET-653]	5.8654	13.75	5.7692	2.7885
UP3342.24.vulva.dic.tif	2493104.tiff	UP3342	let-653; Ex[ductpro::LET-653]	7.5962	14.9038	6.5385	3.9423
UP3342.25.vulva.4-4-19.dic.tif	903937.tiff	UP3342	let-653; Ex[ductpro::LET-653]	8.0769	12.6923	5.0962	3.9423
UP3342.26.vulva.4-4-19.dic.tif	6730512.tiff	UP3342	let-653; Ex[ductpro::LET-653]	7.5962	13.0769	5.3846	2.5
UP3342.26.vulva.dic.tif	7062325.tiff	UP3342	let-653; Ex[ductpro::LET-653]	5.9615	14.3269	5.9615	2.2115
UP3342.29.vulva.dic.tif	5205568.tiff	UP3342	let-653; Ex[ductpro::LET-653]	5.8654	14.8077	7.2115	7.5
UP3342.34.vulva.dic.10-3-19.tif	5518477.tiff	UP3342	let-653; Ex[ductpro::LET-653]	9.2308	13.1731	6.9231	2.9808
UP3342.35.vulva.dic.10-3-19.tif	5324407.tiff	UP3342	let-653; Ex[ductpro::LET-653]	9.9038	13.0769	8.6538	6.4423
UP3342.37.vulva.dic.10-3-19.tif	7413221.tiff	UP3342	let-653; Ex[ductpro::LET-653]	8.9423	13.5577	6.8269	3.3654
UP3342.38.vulva.dic.10-3-19.tif	3810293.tiff	UP3342	let-653; Ex[ductpro::LET-653]	9.2308	11.3462	8.6538	1.6346
UP3342.39.vulva.dic.10-3-19.tif	3456305.tiff	UP3342	let-653; Ex[ductpro::LET-653]	9.6154	12.4038	7.9808	3.2692
UP3342.44.vulva.dic.tif	3719079.tiff	UP3342	let-653; Ex[ductpro::LET-653]	6.0577	13.3654	5.0962	3.6538
UP3342.57.vulva.dic.tif	952803.tiff	UP3342	let-653; Ex[ductpro::LET-653]	5.1923	13.0769	6.25	2.3077
UP3422.18.dic.tif	4033779.tiff	UP3422	Is[LET-653(ZP)]	9.1346	12.3077	6.4423	2.5962
UP3422.19.dic.tif	9890264.tiff	UP3422	Is[LET-653(ZP)]	8.3654	12.0192	6.8269	1.0577
UP3422.22.dic.tif	8694707.tiff	UP3422	Is[LET-653(ZP)]	9.8077	12.5	5.5769	4.0385
UP3422.34.dic.tif	6252575.tiff	UP3422	Is[LET-653(ZP)]	9.9038	11.25	5.6731	2.7885
UP3422.41.dic.tif	6165941.tiff	UP3422	Is[LET-653(ZP)]	9.8077	12.6923	7.8846	0.4808
UP3422.43.dic.tif	4324910.tiff	UP3422	Is[LET-653(ZP)]	10	13.1731	6.0577	4.0385
UP3422.47.dic.tif	1207672.tiff	UP3422	Is[LET-653(ZP)]	10.3846	9.0385	9.8077	0.4808
UP3422.48.dic.tif	5194806.tiff	UP3422	Is[LET-653(ZP)]	10.3846	12.5	7.5962	3.3654
UP3422.49.dic.tif	1222409.tiff	UP3422	Is[LET-653(ZP)]	8.9423	11.9231	7.6923	1.8269
UP3422.50.dic.tif	7559317.tiff	UP3422	Is[LET-653(ZP)]	9.2308	10.5769	8.8462	1.3462
UP3422.51.dic.tif	687890.tiff	UP3422	Is[LET-653(ZP)]	9.5192	13.1731	7.1154	2.5
UP3422.52.dic.tif	3483080.tiff	UP3422	Is[LET-653(ZP)]	10.0962	12.3077	8.2692	3.5577
UP3422.53.dic.tif	6201358.tiff	UP3422	Is[LET-653(ZP)]	9.3269	11.5385	8.0769	0.4808
UP3422.54.dic.tif	5033386.tiff	UP3422	Is[LET-653(ZP)]	9.7115	12.2115	6.5385	2.5
UP3422.55.dic.tif	6066030.tiff	UP3422	Is[LET-653(ZP)]	11.4423	13.8462	8.2692	6.9231
UP3422.56.dic.tif	1514154.tiff	UP3422	Is[LET-653(ZP)]	8.9423	11.5385	7.4038	2.3077
UP3422.57.dic.tif	1716093.tiff	UP3422	Is[LET-653(ZP)]	10.0962	11.3462	6.9231	2.2115
UP3422.58.dic.tif	511696.tiff	UP3422	Is[LET-653(ZP)]	10.1923	12.8846	6.0577	4.0385
UP3422.59.dic.tif	7032077.tiff	UP3422	Is[LET-653(ZP)]	9.1346	10.4808	9.2308	3.4615
UP3422.csIs66.10.vulva.dic.tif	6258839.tiff	UP3422	Is[LET-653(ZP)]	10.4808	12.0192	6.3462	3.0769
UP3462.10.vulva.dic.tif	7009993.tiff	UP3462	let-653; Is[LET-653(ZP)]	7.8846	11.9231	5.0962	3.2692
UP3462.23.vulva.dic.tif	1877436.tiff	UP3462	let-653; Is[LET-653(ZP)]	10.1923	12.7885	8.0769	4.7115
UP3462.30.vulva.dic.tif	1664924.tiff	UP3462	let-653; Is[LET-653(ZP)]	9.6154	11.8269	7.1154	1.5385
UP3462.33.vulva.dic.tif	4505275.tiff	UP3462	let-653; Is[LET-653(ZP)]	10.2885	11.9231	7.3077	2.3077
UP3462.36.vulva.dic.tif	9257440.tiff	UP3462	let-653; Is[LET-653(ZP)]	9.2308	11.0577	7.5	2.7885
UP3462.42.vulva.dic.tif	723608.tiff	UP3462	let-653; Is[LET-653(ZP)]	9.1346	10.2885	7.9808	1.7308
UP3462.45.vulva.dic.tif	8164288.tiff	UP3462	let-653; Is[LET-653(ZP)]	9.8077	10.9615	7.4038	2.5962
UP3462.46.vulva.dic.tif	7653371.tiff	UP3462	let-653; Is[LET-653(ZP)]	10	12.7885	7.6923	3.3654
UP3462.48.vulva.dic.tif	9214150.tiff	UP3462	let-653; Is[LET-653(ZP)]	9.0385	11.9231	6.3462	2.2115
UP3462.50.vulva.dic.tif	3844045.tiff	UP3462	let-653; Is[LET-653(ZP)]	9.4231	11.1538	7.0192	1.6346
UP3462.61.vulva.dic.tif	9999469.tiff	UP3462	let-653; Is[LET-653(ZP)]	10.2885	11.25	7.2115	1.7308
UP3462.62.vulva.dic.tif	8002904.tiff	UP3462	let-653; Is[LET-653(ZP)]	9.7115	11.25	6.9231	2.5962
UP3462.63.vulva.dic.tif	3759378.tiff	UP3462	let-653; Is[LET-653(ZP)]	10.8654	11.5385	8.9423	2.0192
UP3462.64.vulva.dic.tif	1464829.tiff	UP3462	let-653; Is[LET-653(ZP)]	10.3846	9.5192	9.1346	0.8654
UP3462.65.vulva.dic.tif	3881876.tiff	UP3462	let-653; Is[LET-653(ZP)]	9.7115	9.7115	7.8846	1.6346
UP3462.66.vulva.dic.tif	1421859.tiff	UP3462	let-653; Is[LET-653(ZP)]	9.3269	11.8269	7.7885	1.4423
UP3462.67.vulva.dic.tif	1680805.tiff	UP3462	let-653; Is[LET-653(ZP)]	9.4231	11.3462	7.1154	1.7308
UP3462.68.vulva.dic.tif	6020407.tiff	UP3462	let-653; Is[LET-653(ZP)]	9.5192	13.2692	5.1923	4.6154
UP3462.69.vulva.dic.tif	6324202.tiff	UP3462	let-653; Is[LET-653(ZP)]	9.8077	10.0962	7.7885	1.8269
UP3462.70.vulva.dic.tif	8153120.tiff	UP3462	let-653; Is[LET-653(ZP)]	9.4231	12.7885	6.25	3.9423
