# Supplementary material for: A multi-layered and dynamic apical extracellular matrix shapes the vulva lumen in Caenorhabditis elegans
Source: eLife. 2020 Sep 25;9:e57874. doi: 10.7554/eLife.57874 (PMC7544507; doi:10.7554/eLife.57874)
Supplement: Figure 10—source data 1. — The vulD cells of WT or mig-22 L4.4 stage vulvas were traced from a single confocal slice using signal from MIG-2::GFP. Shape descriptors, including aspect ratio, were calculated from these tracings. See Figure 10. [file elife-57874-fig10-data1.xlsx]

## Sheet: Sheet1
2020-07-20		treated each cell as an individual (did not average two cells from same animal)
				Left VulD				Right VulD
Original name	Image	Slice	Perimeter (microns)	Area (microns^2)	Circularity	Aspect ratio	Perimeter (microns)	Area (microns^2)	Circularity	Aspect ratio
UP3995_muIs28_MIG-2-GFP.1.ome.tiff	2386476.tiff	14	12.8438	11.5576	0.8804	1.0788	13.7004	12.8705	0.8617	1.2567
UP3995_muIs28_MIG-2-GFP.2.ome.tiff	7867980.tiff	24	17.4869	19.5842	0.8048	1.232	16.99	16.849	0.7335	1.1795
UP3995_muIs28_MIG-2-GFP.4.ome.tiff	491113.tiff	28	13.2844	12.1295	0.8637	1.474	13.9578	12.8406	0.8283	1.1889
UP3995_muIs28_MIG-2-GFP.5.ome.tiff	5918305.tiff	26	14.3535	13.4971	0.8233	1.1245	14.0152	12.8754	0.8237	1.2215
UP3995_muIs28_MIG-2-GFP.6.ome.tiff	9148991.tiff	28	15.4788	14.6857	0.7702	1.5612	15.1067	15.7847	0.8692	1.226
UP3995_muIs28_MIG-2-GFP_2.10.ome.tiff	4029647.tiff	29	16.787	12.8804	0.5744	1.5552	17.5534	12.4279	0.5069	1.2805
UP3995_muIs28_MIG-2-GFP_2.2.ome.tiff	5669467.tiff	33	13.8089	10.4635	0.6896	1.7582	13.2464	11.9504	0.8559	1.6504
UP3995_muIs28_MIG-2-GFP_2.3.ome.tiff	9471791.tiff	36	14.3783	14.3773	0.8739	1.2464	15.1895	13.3379	0.7265	1.9215
UP3995_muIs28_MIG-2-GFP_2.5.ome.tiff	8556064.tiff	34	13.6645	11.299	0.7604	1.3086	14.2217	12.0499	0.7487	1.2484
UP3995_muIs28_MIG-2-GFP_2.6.ome.tiff	8607944.tiff	33	15.2098	12.3533	0.671	1.2359	16.0704	15.4615	0.7523	1.4712
UP3995_muIs28_MIG-2-GFP_2.7.ome.tiff	1590694.tiff	34	13.5532	11.9305	0.8162	1.5026	12.1879	10.0805	0.8528	1.0788
UP3995_muIs28_MIG-2-GFP_2.9.ome.tiff	57090.tiff	32	15.9217	16.5605	0.8209	1.2558	16.3076	12.1046	0.572	1.4891
UP3995_muIs28_MIG-2-GFP_3.17.ome.tiff	880820.tiff	40	16.9123	18.1868	0.799	1.169	14.163	12.1593	0.7617	1.1554
UP4004_mig-22;muIs28.1.ome.tiff	828012.tiff	33	16.6095	14.4668	0.659	1.8254	15.339	10.8912	0.5817	2.2782
UP4004_mig-22;muIs28.2.ome.tiff	2690431.tiff	41	14.3618	13.0197	0.7932	1.793	13.8036	11.105	0.7324	1.8828
UP4004_mig-22;muIs28.3.ome.tiff	153558.tiff	36	16.3022	13.1092	0.6199	2.95	16.1594	13.522	0.6507	1.7989
UP4004_mig-22;muIs28_2.11.ome.tiff	7059640.tiff	39	18.0994	16.1826	0.6208	2.5729	16.7376	14.8647	0.6668	2.2452
UP4004_mig-22;muIs28_2.12.ome.tiff	3712610.tiff	36	17.7911	18.0127	0.7151	1.9672	14.6824	13.9148	0.8111	1.2355
UP4004_mig-22;muIs28_2.14.ome.tiff	555946.tiff	42	17.0706	15.2625	0.6582	1.733	16.6359	16.3915	0.7443	1.7565
UP4004_mig-22;muIs28_2.17.ome.tiff	7293434.tiff	35	17.4003	15.5212	0.6442	1.4457	16.9802	16.7694	0.7309	1.5197
UP4004_mig-22;muIs28_2.19.ome.tiff	7012462.tiff	41	13.2599	11.6073	0.8296	1.3568	14.2721	11.3387	0.6995	1.3844
UP4004_mig-22;muIs28_2.8.ome.tiff	7379714.tiff	49	15.4253	14.8398	0.7837	1.5663	17.0416	15.3919	0.66	1.7424
