# Supplementary material for: A multi-layered and dynamic apical extracellular matrix shapes the vulva lumen in Caenorhabditis elegans
Source: eLife. 2020 Sep 25;9:e57874. doi: 10.7554/eLife.57874 (PMC7544507; doi:10.7554/eLife.57874)
Supplement: Figure 11—source data 1. — Measurements are taken from boxes drawn within DIC images of vulvas at L4.4 stage. See Figure 11 and Figure 8—figure supplement 1. [file elife-57874-fig11-data1.xlsx]

## Sheet: Data for figure 11.B, S3_L4.4_v
length and width of rectangles drawn within the vulva
Generated 10/27/2019
All measurements are in microns
Original name	New name	Strain Name	Genotype	Shoulder Height	Shoulder Width	Neck Height	Neck Width
(mig-22);let-653.1.vulva.dic.tif	5152509.tiff	UP3967	mig-22; let-653	7.5	15.9615	7.2115	6.4423
(mig-22);let-653.11.vulva.dic.tif	1650664.tiff	UP3967	mig-22; let-653	6.4423	12.0192	7.2115	5.2885
(mig-22);let-653.16.vulva.dic.tif	6192155.tiff	UP3967	mig-22; let-653	4.9038	10.7692	7.5962	1.4423
(mig-22);let-653.2.vulva.dic.tif	6712440.tiff	UP3967	mig-22; let-653	7.5962	14.4231	8.1731	6.4423
(mig-22);let-653.20.vulva.dic.tif	7136642.tiff	UP3967	mig-22; let-653	5.4808	10.7692	6.5385	4.0385
(mig-22);let-653.21.vulva.dic.tif	5363483.tiff	UP3967	mig-22; let-653	4.1346	9.8077	7.5962	1.1538
(mig-22);let-653.22.vulva.dic.tif	1005793.tiff	UP3967	mig-22; let-653	6.5385	11.5385	6.5385	2.8846
(mig-22);let-653.24.vulva.dic.tif	6829750.tiff	UP3967	mig-22; let-653	7.1154	13.3654	6.8269	4.4231
(mig-22);let-653.27.vulva.dic.tif	8269497.tiff	UP3967	mig-22; let-653	7.6923	12.4038	6.5385	3.5577
(mig-22);let-653.34.vulva.dic.tif	7939867.tiff	UP3967	mig-22; let-653	6.7308	13.8462	8.1731	5.8654
(mig-22);let-653.35.vulva.dic.tif	4905639.tiff	UP3967	mig-22; let-653	6.5385	14.2308	7.2115	5.2885
(mig-22);let-653.37.vulva.dic.tif	9444754.tiff	UP3967	mig-22; let-653	6.7308	11.8269	6.0577	2.4038
(mig-22);let-653.39.vulva.dic.tif	5662727.tiff	UP3967	mig-22; let-653	5.8654	12.5962	8.2692	4.5192
(mig-22);let-653.40.vulva.dic.tif	4382316.tiff	UP3967	mig-22; let-653	7.1154	12.5962	8.2692	4.7115
(mig-22);let-653.46.vulva.dic.tif	2943837.tiff	UP3967	mig-22; let-653	7.3077	11.5385	8.0769	4.4231
(mig-22);let-653.47.vulva.dic.tif	2973455.tiff	UP3967	mig-22; let-653	5.9615	10.0962	5.6731	1.25
(mig-22);let-653.49.vulva.dic.tif	8861380.tiff	UP3967	mig-22; let-653	6.7308	12.8846	9.0385	5.0962
(mig-22);let-653.50.vulva.dic.tif	8051939.tiff	UP3967	mig-22; let-653	3.6538	8.75	5.9615	1.8269
(mig-22);let-653.52.vulva.dic.tif	846504.tiff	UP3967	mig-22; let-653	5.6731	11.9231	7.7885	3.0769
(mig-22);let-653.53.vulva.dic.tif	708541.tiff	UP3967	mig-22; let-653	6.6346	10.3846	7.2115	3.6538
(mig-22);let-653.55.vulva.dic.tif	477402.tiff	UP3967	mig-22; let-653	6.5385	12.1154	9.6154	4.6154
(mig-22);let-653.60.vulva.dic.tif	5502916.tiff	UP3967	mig-22; let-653	6.25	12.5962	6.5385	4.1346
(mig-22);let-653.63.vulva.dic.tif	738218.tiff	UP3967	mig-22; let-653	6.7308	12.6923	7.2115	3.6538
(mig-22);let-653.66.vulva.dic.tif	9217338.tiff	UP3967	mig-22; let-653	4.4231	10.7692	9.4231	1.25
(mig-22);let-653.68.vulva.dic.tif	2356242.tiff	UP3967	mig-22; let-653	5.0962	10.1923	5.8654	1.4423
(mig-22);let-653.69.vulva.dic.tif	49087.tiff	UP3967	mig-22; let-653	6.4423	12.2115	7.7885	2.6923
(mig-22);let-653.70.vulva.dic.tif	3673832.tiff	UP3967	mig-22; let-653	7.2115	13.3654	8.6538	5
(mig-22);let-653.8.vulva.dic.tif	5360377.tiff	UP3967	mig-22; let-653	7.3077	11.3462	8.8462	2.9808
N2.1.vulva.dic.tif	6969056.tiff	N2	WT	6.6346	13.6538	4.0385	3.0769
N2.14.vulva.dic.tif	3295771.tiff	N2	WT	6.0577	12.3077	4.4231	5
N2.17.vulva.dic.tif	9899306.tiff	N2	WT	6.9231	13.6538	5.0962	4.2308
N2.22.vulva.dic.tif	3294005.tiff	N2	WT	6.1538	13.0769	4.4231	4.1346
N2.35.vulva.dic.tif	1140025.tiff	N2	WT	5.8654	11.9231	5	5.0962
N2.39.vulva.dic.tif	5422949.tiff	N2	WT	7.6923	12.8846	5.4808	3.9423
N2.52.vulva.dic.tif	9489569.tiff	N2	WT	6.7308	13.0769	4.6154	4.0385
N2.55.vulva.dic.tif	8360703.tiff	N2	WT	7.2115	12.5	4.6154	2.7885
N2.59.vulva.dic.tif	4058637.tiff	N2	WT	6.4423	11.9231	5.3846	4.3269
N2.6.vulva.dic.tif	6768404.tiff	N2	WT	6.3462	13.75	4.6154	4.9038
N2.61.vulva.dic.tif	9252574.tiff	N2	WT	7.4038	14.2308	4.5192	6.7308
N2.62.vulva.dic.tif	9990026.tiff	N2	WT	7.8846	15.5769	5.7692	5.4808
N2.69.vulva.dic.tif	1135500.tiff	N2	WT	6.3462	11.6346	4.6154	4.5192
N2.7.vulva.dic.tif	5142306.tiff	N2	WT	6.0577	12.3077	5	4.7115
N2.70.vulva.dic.tif	5625248.tiff	N2	WT	6.6346	13.5577	4.6154	3.8462
N2.76.vulva.dic.tif	9257196.tiff	N2	WT	7.5962	13.4615	5.1923	3.75
N2.8.vulva.dic.tif	2911149.tiff	N2	WT	5.9615	12.4038	6.1538	2.1154
N2.83.vulva.dic.tif	8877544.tiff	N2	WT	5.4808	11.4423	4.5192	4.9038
N2.93.vulva.dic.tif	2904821.tiff	N2	WT	6.3462	11.5385	4.3269	3.6538
N2.L4vul.12.tiff	5940988.tiff	N2	WT	6.9231	13.6538	5.4808	2.9808
N2.L4vul.15.tiff	3766686.tiff	N2	WT	7.6923	13.0769	5.1923	3.0769
N2.L4vul.24.tiff	7947132.tiff	N2	WT	5.9615	13.6538	5	4.5192
N2.L4vul.26.tiff	964801.tiff	N2	WT	7.8846	12.4038	6.25	3.3654
N2.L4vul.30.tiff	3499633.tiff	N2	WT	6.25	13.1731	5.9615	4.9038
N2.L4vul.32.tiff	6224222.tiff	N2	WT	8.1731	14.9038	4.5192	4.7115
N2.L4vul.33.tiff	8762748.tiff	N2	WT	6.5385	14.0385	6.3462	4.3269
N2.L4vul.35.tiff	7973273.tiff	N2	WT	6.9231	12.8846	8.5577	1.3462
N2.L4vul.37.tiff	1594410.tiff	N2	WT	6.9231	13.5577	5	2.3077
N2.L4vul.4.tiff	703523.tiff	N2	WT	6.8269	14.4231	5.1923	4.0385
NF68.11.vulva.dic.tif	337112.tiff	NF68	mig-22	6.0577	9.9038	6.8269	0.8654
NF68.12.vulva.dic.tif	7114465.tiff	NF68	mig-22	7.0192	11.3462	7.2115	3.4615
NF68.14.vulva.dic.tif	5426646.tiff	NF68	mig-22	5.9615	11.1538	7.2115	2.4038
NF68.17.vulva.dic.tif	330309.tiff	NF68	mig-22	4.2308	9.8077	6.6346	1.9231
NF68.2.vulva.dic.tif	8084945.tiff	NF68	mig-22	5.3846	11.0577	5.5769	2.1154
NF68.21.vulva.dic.tif	2007340.tiff	NF68	mig-22	5	10	5.1923	1.5385
NF68.22.vulva.dic.tif	3500989.tiff	NF68	mig-22	5.3846	10.1923	6.5385	0.7692
NF68.26.vulva.dic.tif	1793042.tiff	NF68	mig-22	5.1923	9.8077	5.1923	1.7308
NF68.3.vulva.dic.tif	8759143.tiff	NF68	mig-22	4.9038	9.5192	7.1154	1.25
NF68.37.vulva.dic.tif	4041037.tiff	NF68	mig-22	4.8077	8.8462	6.7308	1.0577
NF68.39.vulva.dic.tif	821264.tiff	NF68	mig-22	5.1923	10.5769	6.1538	1.4423
NF68.4.vulva.dic.tif	3692902.tiff	NF68	mig-22	6.3462	11.0577	6.8269	3.4615
NF68.40.vulva.dic.tif	5939991.tiff	NF68	mig-22	4.6154	9.6154	7.0192	1.4423
NF68.48.vulva.dic.tif	9400393.tiff	NF68	mig-22	8.3654	14.2308	8.0769	5.5769
NF68.51.vulva.dic.tif	454810.tiff	NF68	mig-22	7.3077	12.5962	8.0769	4.2308
NF68.54.vulva.dic.tif	5267298.tiff	NF68	mig-22	5.1923	10.9615	6.6346	1.25
NF68.56.vulva.dic.tif	8851220.tiff	NF68	mig-22	4.8077	10.5769	6.3462	4.1346
NF68.57.vulva.dic.tif	9334794.tiff	NF68	mig-22	4.9038	10.6731	5.8654	1.6346
NF68.59.vulva.dic.tif	5537524.tiff	NF68	mig-22	5.1923	9.7115	5.9615	2.4038
NF68.61.vulva.dic.tif	3278737.tiff	NF68	mig-22	4.7115	9.2308	6.6346	1.6346
NF68.62.vulva.dic.tif	7267742.tiff	NF68	mig-22	3.8462	8.5577	7.0192	1.6346
NF68.63.vulva.dic.tif	2855999.tiff	NF68	mig-22	5.6731	11.1538	5	2.0192
NF68.65.vulva.dic.tif	5854147.tiff	NF68	mig-22	4.7115	9.8077	6.3462	2.1154
UP2386.1.dic.tif	2499547.tiff	UP2386	Ex[LET-653]	8.5577	14.7115	5.0962	3.5577
UP2386.11.dic.tif	8418646.tiff	UP2386	Ex[LET-653]	7.9808	13.5577	4.6154	4.0385
UP2386.14.dic.tif	6149884.tiff	UP2386	Ex[LET-653]	8.0769	14.5192	5	4.0385
UP2386.15.dic.tif	7118526.tiff	UP2386	Ex[LET-653]	9.1346	13.1731	4.4231	5.2885
UP2386.16.dic.tif	5673817.tiff	UP2386	Ex[LET-653]	8.2692	12.1154	4.5192	4.0385
UP2386.17.dic.tif	4918473.tiff	UP2386	Ex[LET-653]	7.5962	15.1923	4.4231	5.7692
UP2386.19.dic.tif	1505277.tiff	UP2386	Ex[LET-653]	7.4038	14.5192	4.6154	4.7115
UP2386.2.dic.tif	8531768.tiff	UP2386	Ex[LET-653]	6.7308	13.9423	5.5769	3.4615
UP2386.20.dic.tif	688997.tiff	UP2386	Ex[LET-653]	7.0192	13.8462	6.0577	4.8077
UP2386.21.dic.tif	5569564.tiff	UP2386	Ex[LET-653]	8.3654	13.3654	4.4231	4.1346
UP2386.22.dic.tif	8823444.tiff	UP2386	Ex[LET-653]	7.8846	14.2308	5	3.8462
UP2386.23.dic.tif	5751833.tiff	UP2386	Ex[LET-653]	8.75	14.3269	4.5192	3.6538
UP2386.26.dic.tif	264651.tiff	UP2386	Ex[LET-653]	7.4038	15	5.2885	3.9423
UP2386.27.dic.tif	5291766.tiff	UP2386	Ex[LET-653]	8.1731	13.0769	4.6154	4.8077
UP2386.28.dic.tif	9992407.tiff	UP2386	Ex[LET-653]	8.4615	13.4615	4.0385	3.9423
UP2386.29.dic.tif	5721133.tiff	UP2386	Ex[LET-653]	9.2308	13.9423	5.6731	5.7692
UP2386.3.dic.tif	7865051.tiff	UP2386	Ex[LET-653]	6.9231	14.1346	5.0962	5.0962
UP2386.6.dic.tif	5715065.tiff	UP2386	Ex[LET-653]	7.6923	13.3654	5.6731	3.1731
UP2386.7.dic.tif	5339016.tiff	UP2386	Ex[LET-653]	7.3077	13.75	9.6154	3.4615
UP2386.8.dic.tif	9637180.tiff	UP2386	Ex[LET-653]	7.8846	13.9423	5.1923	6.1538
UP2386.9.dic.tif	9526650.tiff	UP2386	Ex[LET-653]	7.7885	14.5192	5.2885	6.25
UP3244.1.vulva.dic.tif	6388850.tiff	UP3244	let-653; Ex[LET-653]	10.2885	19.9038	6.0577	9.4231
UP3244.14.vulva.dic.tif	547690.tiff	UP3244	let-653; Ex[LET-653]	9.9038	14.1346	7.2115	5.1923
UP3244.15.vulva.dic.tif	2407581.tiff	UP3244	let-653; Ex[LET-653]	10.6731	17.9808	7.5962	8.75
UP3244.17.vulva.dic.tif	9804142.tiff	UP3244	let-653; Ex[LET-653]	11.8269	17.3077	7.1154	7.5962
UP3244.18.vulva.dic.tif	1991200.tiff	UP3244	let-653; Ex[LET-653]	8.4615	15.1923	5.5769	5.8654
UP3244.20.vulva.dic.tif	1699701.tiff	UP3244	let-653; Ex[LET-653]	11.4423	17.7885	6.8269	6.1538
UP3244.23.vulva.dic.tif	5553945.tiff	UP3244	let-653; Ex[LET-653]	11.0577	17.5962	8.2692	9.9038
UP3244.25.vulva.dic.tif	9241754.tiff	UP3244	let-653; Ex[LET-653]	10.8654	18.0769	6.3462	8.5577
UP3244.27.vulva.dic.tif	6729589.tiff	UP3244	let-653; Ex[LET-653]	7.6923	16.9231	6.25	6.5385
UP3244.28.vulva.dic.tif	2807764.tiff	UP3244	let-653; Ex[LET-653]	9.0385	18.9423	7.1154	10.5769
UP3244.31.vulva.dic.tif	8513831.tiff	UP3244	let-653; Ex[LET-653]	7.5	16.25	4.8077	7.3077
UP3244.34.vulva.dic.tif	3145487.tiff	UP3244	let-653; Ex[LET-653]	7.8846	17.5962	7.3077	5.4808
UP3244.38.vulva.dic.tif	2652229.tiff	UP3244	let-653; Ex[LET-653]	9.6154	14.6154	7.2115	7.6923
UP3244.39.vulva.dic.tif	112262.tiff	UP3244	let-653; Ex[LET-653]	7.7885	15.4808	5.9615	2.7885
UP3244.41.vulva.dic.tif	9591228.tiff	UP3244	let-653; Ex[LET-653]	7.5962	15	4.7115	5.9615
UP3244.43.vulva.dic.tif	5502525.tiff	UP3244	let-653; Ex[LET-653]	9.0385	16.6346	5.1923	6.7308
UP3244.57.vulva.dic.tif	4487681.tiff	UP3244	let-653; Ex[LET-653]	8.9423	20.0962	6.8269	9.0385
UP3244.6.vulva.dic.tif	3933993.tiff	UP3244	let-653; Ex[LET-653]	10.3846	17.7885	6.6346	8.9423
UP3244.61.vulva.dic.tif	199337.tiff	UP3244	let-653; Ex[LET-653]	8.75	19.0385	5.6731	9.1346
UP3244.65.vulva.dic.tif	2815844.tiff	UP3244	let-653; Ex[LET-653]	7.9808	13.2692	5	4.4231
UP3342-let-653;csEx766.21.L4vulv.tiff	5011332.tiff	UP3342	let-653; Ex[ductpro::LET-653]	9.6154	15.5769	8.2692	5.6731
UP3342-let-653;csEx766.35.L4vulv.tiff	6239467.tiff	UP3342	let-653; Ex[ductpro::LET-653]	7.5962	14.8077	5.4808	4.5192
UP3342-let-653;csEx766.45.L4vulv.tiff	8823004.tiff	UP3342	let-653; Ex[ductpro::LET-653]	7.5	13.9423	4.3269	5.1923
UP3342.13.vulva.4-4-19.dic.tif	3101205.tiff	UP3342	let-653; Ex[ductpro::LET-653]	7.6923	15.4808	5.9615	6.25
UP3342.17.vulva.dic.tif	5020030.tiff	UP3342	let-653; Ex[ductpro::LET-653]	5.5769	13.2692	4.6154	4.1346
UP3342.19.vulva.4-4-19.dic.tif	2380375.tiff	UP3342	let-653; Ex[ductpro::LET-653]	6.7308	16.0577	6.25	5.3846
UP3342.2.vulva.dic.tif	9554004.tiff	UP3342	let-653; Ex[ductpro::LET-653]	6.6346	15.9615	5.5769	5.3846
UP3342.22.vulva.dic.tif	6478621.tiff	UP3342	let-653; Ex[ductpro::LET-653]	8.2692	13.75	5.3846	3.5577
UP3342.27.vulva.dic.tif	1400830.tiff	UP3342	let-653; Ex[ductpro::LET-653]	7.9808	18.6538	6.6346	5.7692
UP3342.28.vulva.4-4-19.dic.tif	3171876.tiff	UP3342	let-653; Ex[ductpro::LET-653]	7.6923	15.1923	5.8654	5.1923
UP3342.28.vulva.dic.tif	4366188.tiff	UP3342	let-653; Ex[ductpro::LET-653]	6.25	10.9615	4.7115	3.3654
UP3342.33.vulva.dic.tif	7284573.tiff	UP3342	let-653; Ex[ductpro::LET-653]	7.3077	13.8462	5.9615	6.0577
UP3342.36.vulva.dic.10-3-19.tif	2970042.tiff	UP3342	let-653; Ex[ductpro::LET-653]	7.0192	15.2885	5.5769	4.2308
UP3342.36.vulva.dic.tif	6531731.tiff	UP3342	let-653; Ex[ductpro::LET-653]	5.1923	11.6346	5.1923	3.6538
UP3342.4.vulva.dic.tif	6982881.tiff	UP3342	let-653; Ex[ductpro::LET-653]	7.3077	14.5192	4.8077	4.1346
UP3342.40.vulva.dic.tif	2438754.tiff	UP3342	let-653; Ex[ductpro::LET-653]	6.3462	14.1346	5.3846	5
UP3342.41.vulva.dic.tif	1817802.tiff	UP3342	let-653; Ex[ductpro::LET-653]	4.5192	12.8846	5.0962	4.3269
UP3342.42.vulva.dic.tif	2320896.tiff	UP3342	let-653; Ex[ductpro::LET-653]	5.4808	11.8269	4.9038	3.2692
UP3342.46.vulva.dic.tif	5135712.tiff	UP3342	let-653; Ex[ductpro::LET-653]	7.3077	16.9231	5.8654	5.3846
UP3342.47.vulva.dic.tif	1943228.tiff	UP3342	let-653; Ex[ductpro::LET-653]	6.4423	14.9038	4.8077	7.2115
UP3342.51.vulva.dic.tif	3486148.tiff	UP3342	let-653; Ex[ductpro::LET-653]	6.3462	11.7308	4.8077	4.7115
UP3342.52.vulva.dic.tif	7007389.tiff	UP3342	let-653; Ex[ductpro::LET-653]	6.8269	14.9038	5.7692	6.6346
UP3342.55.vulva.dic.tif	7462906.tiff	UP3342	let-653; Ex[ductpro::LET-653]	7.3077	13.9423	4.8077	3.5577
UP3342.56.vulva.dic.tif	3420165.tiff	UP3342	let-653; Ex[ductpro::LET-653]	5.3846	13.3654	6.7308	1.1538
UP3342.61.vulva.dic.tif	2942463.tiff	UP3342	let-653; Ex[ductpro::LET-653]	5.5769	13.2692	5.0962	3.6538
UP3342.8.vulva.4-4-19.dic.tif	2579266.tiff	UP3342	let-653; Ex[ductpro::LET-653]	6.25	14.8077	4.8077	4.4231
UP3422.13.dic.tif	4259180.tiff	UP3422	Is[LET-653(ZP)]	7.2115	13.1731	5.0962	4.7115
UP3422.14.dic.tif	4843405.tiff	UP3422	Is[LET-653(ZP)]	7.2115	13.6538	4.7115	5.0962
UP3422.15.dic.tif	262019.tiff	UP3422	Is[LET-653(ZP)]	6.8269	13.9423	5.2885	4.4231
UP3422.16.dic.tif	3028407.tiff	UP3422	Is[LET-653(ZP)]	6.6346	14.5192	4.6154	2.9808
UP3422.17.dic.tif	6113240.tiff	UP3422	Is[LET-653(ZP)]	6.7308	14.4231	5.4808	3.0769
UP3422.20.dic.tif	3559817.tiff	UP3422	Is[LET-653(ZP)]	6.5385	14.2308	5.2885	4.6154
UP3422.21.dic.tif	5147175.tiff	UP3422	Is[LET-653(ZP)]	7.4038	13.6538	5.1923	4.8077
UP3422.27.dic.tif	6640936.tiff	UP3422	Is[LET-653(ZP)]	7.5962	14.4231	4.8077	4.3269
UP3422.29.dic.tif	3440846.tiff	UP3422	Is[LET-653(ZP)]	7.2115	14.6154	4.5192	3.8462
UP3422.31.dic.tif	9675894.tiff	UP3422	Is[LET-653(ZP)]	7.3077	14.7115	5.1923	4.2308
UP3422.32.dic.tif	5176403.tiff	UP3422	Is[LET-653(ZP)]	8.4615	15.6731	5	5
UP3422.33.dic.tif	3847504.tiff	UP3422	Is[LET-653(ZP)]	8.0769	14.2308	5.4808	3.2692
UP3422.35.dic.tif	3180922.tiff	UP3422	Is[LET-653(ZP)]	7.0192	14.6154	4.7115	3.75
UP3422.36.dic.tif	6630424.tiff	UP3422	Is[LET-653(ZP)]	8.75	12.3077	4.5192	2.5962
UP3422.38.dic.tif	5473889.tiff	UP3422	Is[LET-653(ZP)]	6.8269	14.5192	5.0962	4.6154
UP3422.39.dic.tif	9390167.tiff	UP3422	Is[LET-653(ZP)]	8.1731	15.0962	4.8077	3.5577
UP3422.40.dic.tif	3548424.tiff	UP3422	Is[LET-653(ZP)]	7.8846	15.3846	5.4808	4.7115
UP3422.42.dic.tif	4976315.tiff	UP3422	Is[LET-653(ZP)]	7.2115	15.3846	5.3846	5.1923
UP3422.44.dic.tif	2104772.tiff	UP3422	Is[LET-653(ZP)]	7.2115	14.7115	5.0962	4.3269
UP3422.46.dic.tif	9098952.tiff	UP3422	Is[LET-653(ZP)]	8.2692	15.5769	5	5.4808
UP3462.21.vulva.dic.tif	6497412.tiff	UP3462	let-653; Is[LET-653(ZP)]	9.1346	17.5962	7.1154	7.2115
UP3462.22.vulva.dic.tif	4098305.tiff	UP3462	let-653; Is[LET-653(ZP)]	7.8846	17.1154	5.9615	6.8269
UP3462.34.vulva.dic.tif	186984.tiff	UP3462	let-653; Is[LET-653(ZP)]	7.4038	16.5385	5.4808	5.9615
UP3462.35.vulva.dic.tif	8038945.tiff	UP3462	let-653; Is[LET-653(ZP)]	7.8846	15.0962	4.1346	5.4808
UP3462.37.vulva.dic.tif	7571744.tiff	UP3462	let-653; Is[LET-653(ZP)]	7.0192	14.5192	5.5769	5.5769
UP3462.38.vulva.dic.tif	8501857.tiff	UP3462	let-653; Is[LET-653(ZP)]	7.9808	15	4.9038	3.5577
UP3462.39.vulva.dic.tif	8149710.tiff	UP3462	let-653; Is[LET-653(ZP)]	8.1731	17.5	4.9038	4.7115
UP3462.40.vulva.dic.tif	7159651.tiff	UP3462	let-653; Is[LET-653(ZP)]	7.5	14.4231	4.7115	4.4231
UP3462.41.vulva.dic.tif	3203467.tiff	UP3462	let-653; Is[LET-653(ZP)]	9.0385	15	7.5	1.6346
UP3462.43.vulva.dic.tif	2096240.tiff	UP3462	let-653; Is[LET-653(ZP)]	7.7885	14.7115	6.5385	4.2308
UP3462.44.vulva.dic.tif	7209724.tiff	UP3462	let-653; Is[LET-653(ZP)]	6.6346	13.75	5.1923	4.3269
UP3462.47.vulva.dic.tif	182466.tiff	UP3462	let-653; Is[LET-653(ZP)]	7.7885	16.3462	6.3462	5.6731
UP3462.49.vulva.dic.tif	8330325.tiff	UP3462	let-653; Is[LET-653(ZP)]	8.4615	14.6154	6.0577	4.7115
UP3462.51.vulva.dic.tif	7879225.tiff	UP3462	let-653; Is[LET-653(ZP)]	8.4615	14.8077	4.7115	5.9615
UP3462.52.vulva.dic.tif	4579003.tiff	UP3462	let-653; Is[LET-653(ZP)]	7.5962	13.9423	5.2885	4.4231
UP3462.53.vulva.dic.tif	8800819.tiff	UP3462	let-653; Is[LET-653(ZP)]	9.9038	15	5	4.2308
UP3462.54.vulva.dic.tif	4429610.tiff	UP3462	let-653; Is[LET-653(ZP)]	7.9808	15.4808	5.9615	4.6154
UP3462.55.vulva.dic.tif	3781162.tiff	UP3462	let-653; Is[LET-653(ZP)]	7.0192	14.4231	4.6154	4.2308
UP3462.57.vulva.dic.tif	970990.tiff	UP3462	let-653; Is[LET-653(ZP)]	7.5962	14.9038	6.0577	5.3846
UP3462.59.vulva.dic.tif	73150.tiff	UP3462	let-653; Is[LET-653(ZP)]	7.5962	14.6154	4.3269	3.75
